# Supplementary material
Source: PubMed Central journal article supplement (PMC3017435)

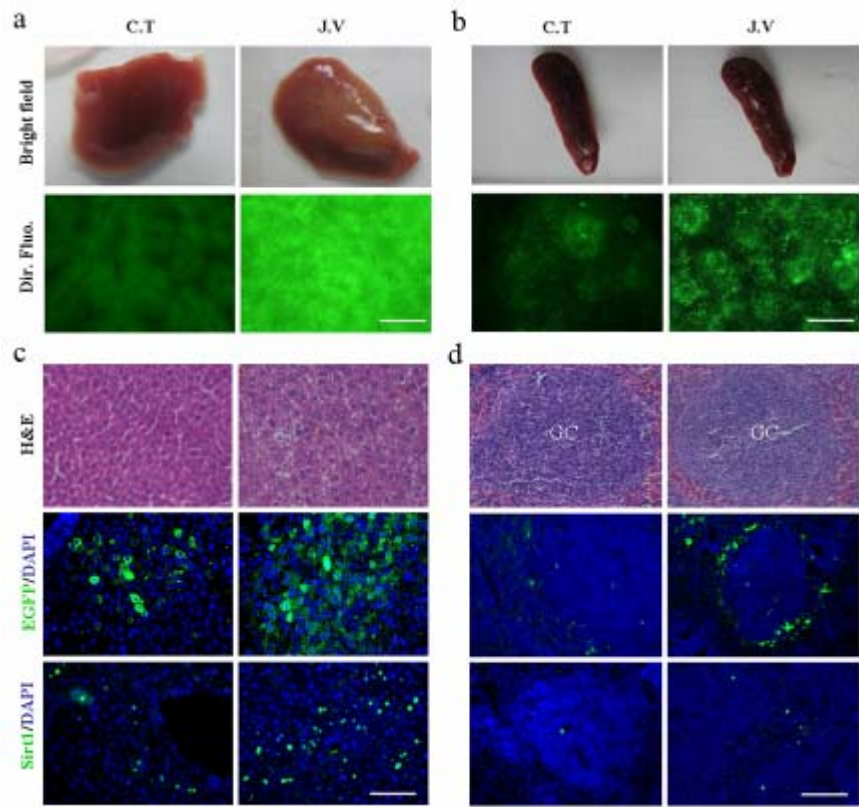

Supplement: mt2010187x1.pdf [file mt2010187x1.pdf]

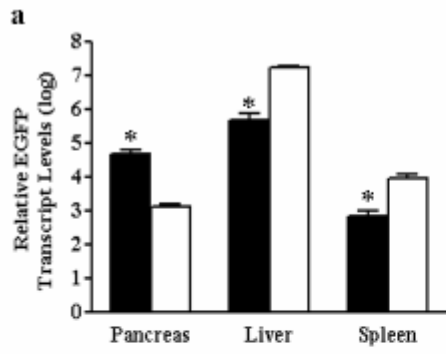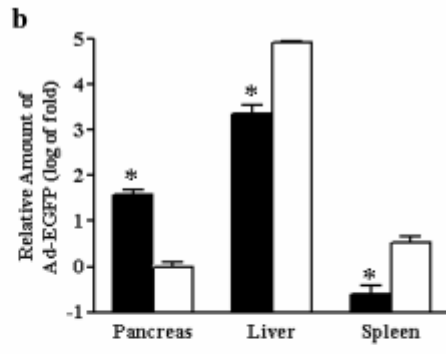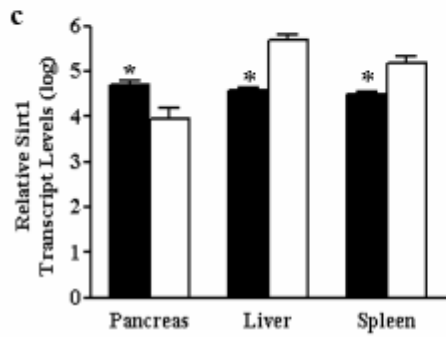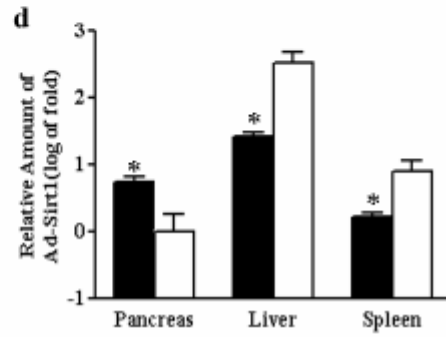

Supplement: mt2010187x2.pdf [file mt2010187x2.pdf]

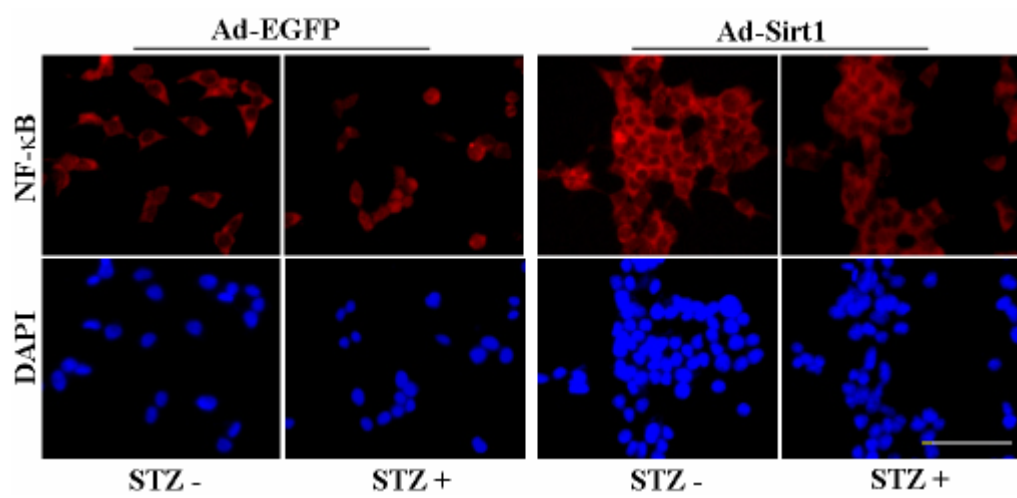

Supplement: mt2010187x3.pdf [file mt2010187x3.pdf]

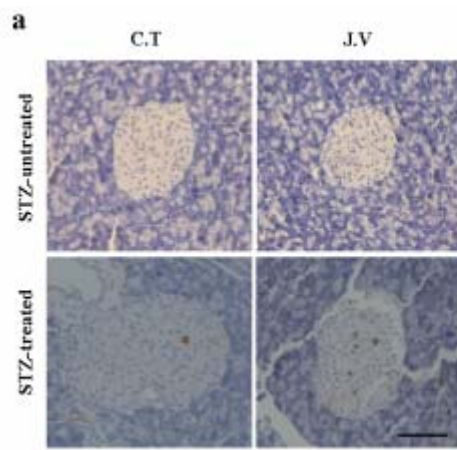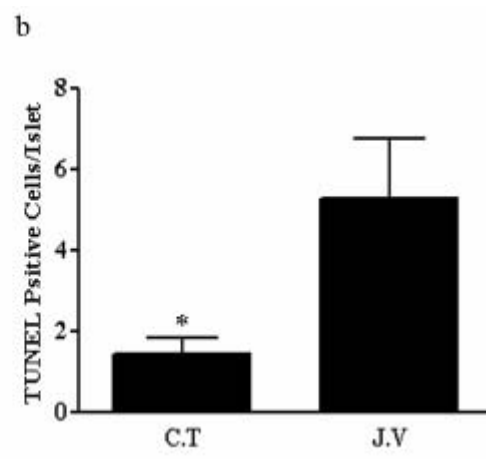

Supplement: mt2010187x4.pdf [file mt2010187x4.pdf]

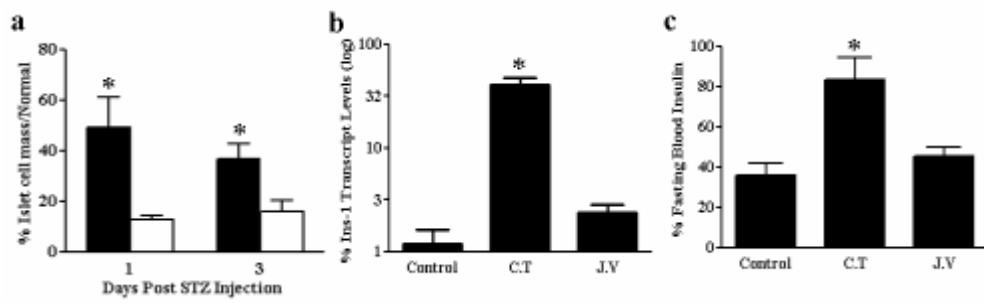

Supplement: mt2010187x5.pdf [file mt2010187x5.pdf]

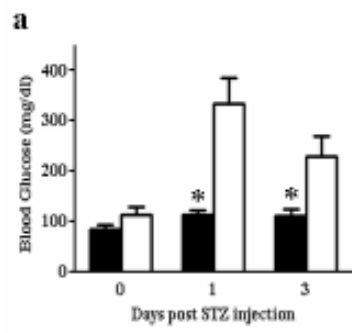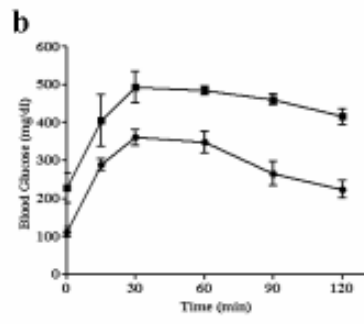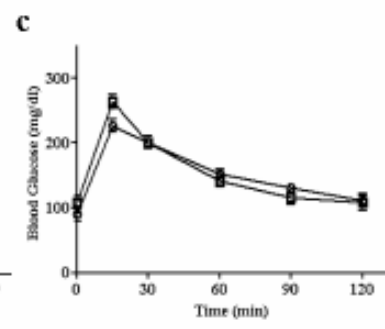

Supplement: mt2010187x6.pdf [file mt2010187x6.pdf]
